# Supplementary material
Source: publisher figshare collection journal article supplement (https://rs.figshare.com/ndownloader/files/13856231)
Supplement: Supplementary file 1 [file 13856231]

## Sheet: Payton&Tran-Biology Letters
Datas of Payton & Tran, Biology Letters, 2018 : individual and mean daily VOA values (average of measures every 1.6 second, corresponding to 54 000 measures/day) of diploid and triploid oysters Crassostrea gigas in Arcachon Bay (France) (* NM : new moon ; 1QM : first quarter moon ; FM : full moon ; 3QM : third quarter moon)
				Daily valve opening amplitude (VOA, %) of diploid oysters							Daily valve opening amplitude (VOA, %) of triploid oysters
	Date	Lunar phases*	Illuminated moon surface value (%)	Oyster 1	Oyster 2	Oyster 3	Oyster 4	Oyster 5	Oyster 6	Mean values	Oyster 1	Oyster 2	Oyster 3	Oyster 4	Oyster 5	Oyster 6	Mean values
	2014-12-22	NM	0.5	59.628	66.654	75.101	60.971	70.142	60.737	65.5388	71.493	0	67.743	71.859	83.408	65.236	59.9565
	2014-12-23		3.3	74.99	69.166	76.528	62.683	84.232	62.448	71.6745	82.529	47.233	65.913	70.821	59.25	61.021	64.4612
	2014-12-24		8.9	74.486	74.715	66.617	72.271	71.95	73.112	72.1918	83.938	53.068	56.669	69.846	70.099	54.537	64.6928
	2014-12-25		17	52.451	62.488	71.232	58.24	59.945	70.287	62.4405	68.378	0	45.986	61.174	75.616	48.945	50.0165
	2014-12-26		27	71.647	58.275	57.551	46.809	76.727	59.444	61.7422	78.24	57.356	65.761	59.308	61.672	54.176	62.7522
	2014-12-27		38.2	54.208	59.6	53.166	60.936	44.238	52.843	54.1652	65.538	2.228	52.067	64.875	60.228	45.549	48.4142
	2014-12-28	1QM	49.9	53.041	53.365	47.952	50.406	37.319	45.677	47.96	38.262	0	32.577	52.113	46.963	39.369	34.8807
	2014-12-29		61.3	42.475	55.021	54.907	68.527	47.058	33.748	50.2893	66.552	0	32.382	54.25	50.84	39.041	40.5108
	2014-12-30		71.9	67.718	73.938	58.325	60.822	47.067	75.338	63.868	64.876	42.222	48.859	58.177	60.964	65.573	56.7785
	2014-12-31		81.3	75.759	64.483	77.866	73.118	38.61	75.79	67.6043	42.679	56.828	58.525	80.467	60.361	67.315	61.0292
	2015-01-01		88.9	75.162	63.135	81.085	64.82	70.026	80.479	72.4512	80.184	64.592	57.219	73.877	72.282	59.468	67.937
	2015-01-02		94.7	71.693	63.93	64.692	72.584	61.563	72.151	67.7688	73.13	60.869	61.612	73.286	77.41	55.154	66.9102
	2015-01-03		96.3	70.509	64.896	63.307	64.396	71.219	78.809	68.856	70.422	70.602	56.278	70.369	74.218	65.026	67.8192
	2015-01-04		98.3	65.562	60.739	64.98	61.844	34.695	77.946	60.961	74.083	58.839	55.753	66.474	73.023	52.92	63.5153
	2015-01-05	FM	99.8	61.585	62.64	64.736	76.293	85.234	80.948	71.906	68.818	58.1	54.521	69.211	80.966	55.54	64.526
	2015-01-06		99.2	84.178	72.91	80.312	77.232	76.681	78.568	78.3135	88.57	82.351	65.936	67.304	88.202	66.015	76.3963
	2015-01-07		96.6	78.754	72.031	79.484	79.311	93.012	79.424	80.336	76.656	84.037	62.263	76.338	84.577	75.549	76.57
	2015-01-08		92.2	77.29	71.225	66.299	72.97	65.325	77.028	71.6895	82.129	68.537	73.738	80.424	65.362	71.825	73.6692
	2015-01-09		86.3	69.319	67.383	63.603	66.245	59.362	70.527	66.0732	79.272	66.3	55.537	65.193	59.698	68.293	65.7155
	2015-01-10		79	73.266	67.462	61.26	62.327	50.228	75.661	65.034	67.34	70.757	55.735	80.226	71.923	58.204	67.3642
	2015-01-11		70.7	61.913	65.73	54.024	54.852	48.703	60.274	57.5827	68.946	61.615	58.743	69.942	58.259	64.021	63.5877
	2015-01-12		61.5	81.78	63.358	84.675	75.943	75.939	75.27	76.1608	85.471	75.242	83.192	76.066	81.421	76.883	79.7125
	2015-01-13	3QM	51.7	84.55	78.493	82.5	74.991	65.792	80.907	77.8722	83.429	77.389	78.746	78.975	82.468	59.074	76.6802
	2015-01-14		41.6	66.057	62.605	49.671	69.943	64.807	71.61	64.1155	62.528	72.004	73.02	81.749	68.484	50.176	67.9935
	2015-01-15		31.6	77.13	73.426	59.055	74.174	73.726	76.391	72.317	79.564	70.694	74.977	71.713	66.749	71.47	72.5278
	2015-01-16		22	73.389	65.898	76.894	65.103	69.394	81.205	71.9805	73.911	67.95	73.524	66.441	73.556	63.353	69.7892
	2015-01-17		13.4	84.407	70.574	84.754	58.455	63.942	75.604	72.956	79.975	49.812	79.03	88.208	89.355	67.379	75.6265
	2015-01-18		6.5	85.473	71.351	76.086	63.059	92.954	71.231	76.6923	79.055	57.369	75.699	68.75	83.436	66.838	71.8578
	2015-01-19		1.9	79.877	60.187	83.124	70.051	77.538	79.882	75.1098	82.047	61.836	76.398	79.993	84.43	61.393	74.3495
	2015-01-20	NM	0.2	77.736	68.919	85.213	81.677	92.816	79.113	80.9123	86.625	60.139	75.736	81.32	72.575	66.329	73.7873
	2015-01-21		1.6	84.494	79.062	90.354	76.798	93.592	80.487	84.1312	84.363	71.514	74.354	74.927	83.104	79.545	77.9678
	2015-01-22		6.2	76.151	68.69	70.184	78.287	70.578	73.051	72.8235	75.376	57.576	67.115	70.223	79.665	62.882	68.8062
	2015-01-23		13.5	79.48	68.877	88.83	79.671	75.502	79.228	78.598	76.212	73.332	72.851	89.139	59.008	67.837	73.0632
	2015-01-24		22.9	74.245	66.369	70.541	78.695	79.467	81.695	75.1687	78.257	50.846	70.407	70.332	82.343	58.804	68.4982
	2015-01-25		33.7	68.23	71.262	84.185	77.9	70.692	78.322	75.0985	76.935	53.032	68.457	69.08	83.739	72.214	70.5762
	2015-01-26		45	68.998	78.526	82.979	76.566	85.715	69.36	77.024	70.175	76.086	74.298	79.244	67.349	73.521	73.4455
	2015-01-27	1QM	56.3	68.958	65.968	71.785	67.371	70.807	79.115	70.6673	62.745	65.663	64.916	81.565	80.41	66.8	70.3498
	2015-01-28		66.9	69.12	70.528	73.793	73.942	57.523	74.381	69.8812	70.071	69.642	75.959	75.147	70.952	76.49	73.0435
	2015-01-29		76.5	76.396	68.041	74.139	53.867	69.575	64.774	67.7987	62.117	58.523	64.787	75.493	57.57	53.888	62.063
	2015-01-30		84.7	52.826	66.302	57.105	51.505	44.175	61.52	55.5722	78.738	45.296	50.084	79.102	49.543	44.035	57.7997
	2015-01-31		91.3	71.702	73.918	57.891	74.065	68.122	79.977	70.9458	75.676	37.049	56.256	60.271	68.724	55.151	58.8545
	2015-02-01		96.1	49.349	37.126	68.779	41.496	51.676	24.41	45.4727	29.803	33.778	45.512	33.891	33.828	31.999	34.8018
	2015-02-02		97.5	63.23	63.852	83.209	39.297	24.202	82.927	59.4528	63.739	0	59.214	65.691	57.643	31.771	46.343
	2015-02-03		98.9	60.149	67.26	45.277	34.842	64.918	35.757	51.3672	60.947	0	45.711	83.476	63.866	43.046	49.5077
	2015-02-04	FM	99.9	56.763	56.52	70.801	49.482	68.415	78.016	63.3328	55.37	30.161	38.462	77.202	47.549	42.49	48.539
	2015-02-05		98.9	68.965	73.513	60.072	53.66	31.174	73.761	60.1908	70.797	25.574	54.034	61.929	56.471	40.325	51.5217
	2015-02-06		96	59.743	54.478	72.444	74.552	81.065	67.649	68.3218	61.65	0	39.516	57.947	61.484	30.51	41.8512
	2015-02-07		91.5	78.376	79.682	80.111	75.234	75.49	79.676	78.0948	84.295	0	71.49	90.068	73.617	56.838	62.718
	2015-02-08		85.4	80.724	62.004	86.324	76.829	58.163	63.631	71.2792	82.663	0	42.045	56.368	65.564	36.515	47.1925
	2015-02-09		77.8	61.615	87.232	76.908	81.277	91.489	79.756	79.7128	82.842	19.516	68.608	79.38	62.889	32.133	57.5613
	2015-02-10		69.1	82.086	83.906	92.888	90.032	91.165	90.712	88.4648	78.823	66.507	87.11	71.671	76.018	63.481	73.935
	2015-02-11		59.5	79.723	81.917	66.635	74.078	91.54	76.874	78.4612	85.525	80.452	86.934	63.276	66.212	57.638	73.3395
	2015-02-12	3QM	49.2	86.987	81.352	69.245	79.539	59.197	88.226	77.4243	86.138	80.488	89.715	60.745	76.313	79.127	78.7543
	2015-02-13		38.5	83.651	80.7	91.685	84.98	94.695	83.569	86.5467	92.113	41.132	78.316	65.854	92.644	78.156	74.7025
	2015-02-14		28	84.727	75.072	71.632	81.837	75.12	83.314	78.617	77.978	78.621	88.865	62.112	60.501	75.758	73.9725
	2015-02-15		18.2	83.719	83.96	86.413	82.628	88.305	76.096	83.5202	90.453	76.312	84.721	72.787	74.62	65.543	77.406
	2015-02-16		9.9	80.043	76.735	74.1	74.945	84.233	79.465	78.2535	79.523	73.538	80.755	89.847	63.566	79.585	77.8023
	2015-02-17		3.8	75.232	76.355	79.775	83.248	74.697	81.611	78.4863	87.009	72.166	74.386	76.149	83.855	77.763	78.5547
	2015-02-18		0.5	77.57	73.636	77.6	75.458	76.424	83.26	77.3247	88.348	74.779	73.569	75.816	77.693	77.771	77.996
	2015-02-19	NM	0.5	83.8	79.604	91.683	77.392	73.867	90.162	82.7513	84.361	83.835	79.437	61.628	76.69	71.051	76.167
	2015-02-20		3.8	82.512	82.569	85.575	76.12	91.329	84.327	83.7387	79.789	77.474	81.45	74.014	67.856	80.068	76.7752
	2015-02-21		10.1	82.116	80.765	69.517	78.001	66.936	82.811	76.691	90.945	81.634	84.386	74.059	67.756	69.505	78.0475
	2015-02-22		18.6	80.052	79.272	87.461	72.16	84.087	72.369	79.2335	80.88	74.464	72.462	73.895	72.617	81.582	75.9833
	2015-02-23		28.7	71.665	72.314	66.611	73.358	68.85	79.118	71.986	83.522	61.342	83.883	71.54	71.88	77.876	75.0072
	2015-02-24		39.5	63.793	72.718	76.633	69.062	71.12	70.509	70.6392	80.65	57.253	67.772	69.306	70.853	73.444	69.8797
	2015-02-25	1QM	50.5	66.019	70.617	65.646	71.855	62.098	66.751	67.1643	62.118	39.804	67.152	65.552	55.105	66.854	59.4308
	2015-02-26		61.1	63.248	64.127	63.799	59.749	46.572	59.667	59.527	67.217	31.965	65.571	66.105	61.694	67.727	60.0465
	2015-02-27		71	51.901	65.388	48.826	58.655	70.749	44.886	56.7342	37.741	22.279	59.338	56.983	61.193	59.794	49.5547
	2015-02-28		79.7	68.573	74.468	72.54	69.28	54.366	56.888	66.0192	74.285	19.372	72.97	65.342	63.322	74.777	61.678
	2015-03-01		87.1	32.826	63.795	73.759	63.402	57.986	54.69	57.743	70.886	11.7	65.397	64.252	58.714	54.068	54.1695
	2015-03-02		92.9	52.837	62.206	55.13	66.318	50.052	58.872	57.5692	69.024	27.063	70.607	62.803	57.303	63.514	58.3857
	2015-03-03		97.1	63.049	64.02	69.674	65.235	72.966	62.787	66.2885	75.227	0	73.1	68.921	69.026	57.535	57.3015
	2015-03-04		98.2	69.112	67.533	80.097	59.942	59.307	67.646	67.2728	59.05	4.953	67.55	61.801	74.845	61.96	55.0265
	2015-03-05	FM	99.4	72.894	79.892	82.387	64.346	73.25	73.576	74.3908	78.517	63.347	65.456	71.317	82.191	58.671	69.9165
	2015-03-06		99.9	83.701	79.528	82.742	65.772	67.358	83.095	77.0327	79.857	63.271	77.568	73.396	82.381		75.2946
	2015-03-07		98.5	85.246	81.551	81.5	81.928	65.274	77.14	78.7732	81.151	81.033	79.31	74.187	86.764		80.489
	2015-03-08		95.3	82.82	81.157	79.98	78.052	91.074	86.308	83.2318	80.585	83.305	80.386	74.974	86.615		81.173
	2015-03-09		90.2	81.282	76.229	79.718	76.975	72.493	79.057	77.6257	79.413	76.582	80.22	76.178	86.714		79.8214
	2015-03-10		83.6	83.323	85.112	82.312	82.564	91.261	86.24	85.1353	75.197	82.994	85.877	71.571	88.545		80.8368
	2015-03-11		75.4	74.29	76.487	76.333	73.4	68.75	76.182	74.2403	80.683	75.369	73.652	73.414	75.039		75.6314
	2015-03-12		65.9	68.673	70.297	69.583	70.068	71.823	76.506	71.1583	68.351	77.882	61.894	66.914	78.724		70.753
	2015-03-13	3QM	55.4	72.657	73.473	71.284	62.125	75.009	74.828	71.5627	80.758	75.527	74.917	63.365	72.668		73.447
	2015-03-14		44.4	54.782	66.235	54.047	67.757	51.207	71.014	60.8403	66.561	52.609	60.905	69.944	66.464		63.2966
	2015-03-15		33.2	65.983	76.382	76.772	71.872	48.38	73.438	68.8045	72.809	76.49	72.774	72.195	74.476		73.7488
	2015-03-16		22.6	58.442	77.222	66.752	74.233	38.544	82.079	66.212	79.292	72.74	74.129	74.308	81.086		76.311
	2015-03-17		13.2	65.208	68.434	68.666	60.85	43.551	59.732	61.0735	70.675	58.625	76.525	65.212	77.232		69.6538
	2015-03-18		5.9	66.988	69.387	67.213	74.298	64.754	55.877	66.4195	80.648	65.693	76.746	73.09	59.595		71.1544
	2015-03-19		1.4	71.157	78.956	68.274	76.856	44.706	71.614	68.5938	80.24	80.678	79.693	70.384	66.817		75.5624
	2015-03-20	NM	0	76.34	80.711	74.855	78.336	85.766	79.233	79.2068	74.778	73.539	76.96	76.517	83.555		77.0698
	2015-03-21		2	79.897	79.146	67.525	77.854		81.677	77.2198	81.186	85.064	77.812	90.128	84.292		83.6964
	2015-03-22		7	76.229	76.88	72.55	75.75		71.79	74.6398	81.633	66.532	74.025	75.909	79.839		75.5876
	2015-03-23		14.4	77.965	80.701	66.74	80.718		78.922	77.0092	81.824	72.909	75.818	62.849	79.92		74.664
	2015-03-24		23.5	73.892	68.425	73.466	67.031		70.759	70.7146	66.865	74.632	76.016	71.456	78.858		73.5654
	2015-03-25		33.7	64.102	72.017	72.903	66.559		82.236	71.5634	69.934	65.377	62.658	52.574	72.212		64.551
	2015-03-26		44.2	49.141	69.196	69.354	75.839		60.87	64.88	60.397	65.359	68.951	59.411	52.106		61.2448
	2015-03-27	1QM	54.7	43.2377	62.15	59.3893	59.2961		64.1464	57.6439	60.6692	65.6963	50.4228	70.1552	48.6331		59.1153
	2015-03-28		64.6	31.3336	57.1185	61.4481	53.6869		64.577	53.6328	50.204	51.6483	62.9132	71.0472	69.95		61.1526
	2015-03-29		73.8	40.07	67.287	75.628	55.586		68.313	61.3768	74.791	58.791	77.163	60.497	70.501		68.3486
	2015-03-30		81.9	47.9	69.084	66.788	45.281		69.301	59.6708	65.037	70.896	79.989	71.063	77.309		72.8588
	2015-03-31		88.8	57.6857	71.1163	69.4315	56.4432		78.7879	66.6929	72.757	59.795	76.335	69.0412	71.7125		69.9282
	2015-04-01		94.1	77.728	79.478	76.029	64.869		81.942	76.0092	76.003	70.57	62.899	65.997	84.167		71.9272
	2015-04-02		97.8	80.643	82.758	75.292	76.138		78.021	78.5704	77.49	85.263	81.91	93.477	85.895		84.807
	2015-04-03		99.8	82.728	84.568	71.108	79.392		83.899	80.339	79.365	80.409	83.296	69.563	86.063		79.7392
	2015-04-04	FM
